# Supplementary material for: Identification of Antioxidant Metabolites from Five Plants (Calophyllum inophyllum, Gardenia taitensis, Curcuma longa, Cordia subcordata, Ficus prolixa) of the Polynesian Pharmacopoeia and Cosmetopoeia for Skin Care
Source: MDPI journal article supplement (doi:10.3390/antiox12101870), 2023-10-16
Supplement: s1 [file s1]

# Identification of antioxidant metabolites from Five Plants of the Polynesian Pharmacopoeia and Cosmetopoeia for skin care

Marion Chambon <sup>1</sup>, Raimana Ho <sup>1</sup>, Beatrice Baghdikian <sup>2</sup>, Gaëtan Herbette <sup>3</sup>, Sok-Siya Bun-Llopet <sup>2</sup>, Elnur Garayev <sup>2</sup>, and Phila Raharivelomanana <sup>1,\*</sup>

<sup>1</sup> UMR 214 EIO, Université de Polynésie Française, IFREMER, ILM, IRD, BP 6570, F-98702, Faaa, Tahiti, French Polynesia marion.chambon@doctorant.upf.pf (M.C.); raimana.ho@upf.pf (R.H.)

<sup>2</sup> Aix Marseille Univ, CNRS 7263, IRD 237, Avignon Université, IMBE, 27 Blvd Jean Moulin, Service of Pharmacognosy, Faculty of Pharmacy, 13385 Marseille, France; beatrice.baghdikian@univ-amu.fr (B.B.); sok-siya.bun@univ-amu.fr (S.-S.B.-L.) elnur.garayev@univ-amu.fr (E.G.)

<sup>3</sup> Aix Marseille Université, CNRS, Centrale Méditerranée, FSCM, Spectropole, Service 511, Campus Saint-Jérôme, 13397 Marseille, France; gaetan.herbette@univ-amu.fr (G.H.)

\* Correspondence: phila.raharivelomanana@upf.pf

Table S1. Studied plant presentation

Table S2. MZmine parameters

Figure S1. On-Line RP HPLC DPPH assay chromatogram profiles of inactive extract.

Figure S2. Molecular Network cluster created with GNPS using spectral data of crude extracts in negative mode

**Table S1.** Studied plant presentation

***Calophyllum inophyllum* L.**

Family: Calophyllaceae

Vernacular name: Tamanu

Biogeographic status: Polynesian introduction

Parts used: Leaves and fruits (nuts)

Botanical description: Evergreen tree of 5-12 m in height. Bark gray brown exuding pellucid resins when wounded. Broadly elliptic green leaf, shiny on both surfaces. White scented flowers. Green globose drupes, yellow when mature fruit (2.5 cm in diam).

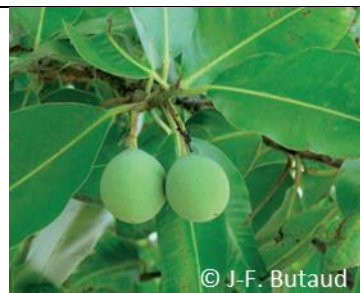

***Gardenia taitensis* DC.**

Family: Rubiaceae

Vernacular name: Tiare

Biogeographic status: Polynesian introduction

Parts used: Flowers

Botanical description: Evergreen shrub or small tree (1-6 m tall). Glossy dark green opposite leaves (5-16 cm long). Creamy white fragrant flowers, pinwheel-shaped with 5 to 9 lobes (4 cm long). Ellipsoidal fruits within numerous seeds in orange pulp at maturity.

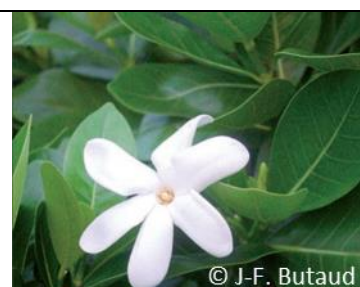

***Curcuma longa* L.**

Family: Zingiberaceae

Vernacular name: Rea

Biogeographic status: Polynesian introduction

Parts used: Rhizomes

Botanical description: Herbaceous plants of 1 m. Alternate blade green leaves (76-115 cm long). Aromatic orange-yellow cylindrical rhizomes composed by many branched. Light purple and white to green inflorescence and flowers with bright-yellow corolla tube producing small brown sterile seeds.

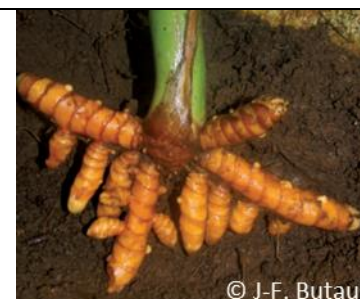

***Cordia subcordata* Lam.**

Family: Boraginaceae

Vernacular name: Tou

Biogeographic status: Indigenous

Parts used: Leaves

Botanical description: Evergreen tree of 7-15 m with yellow-brown bark, growing in coastal area. Ovate alternate leaves, light green, shiny above and dull below. Flowers with orange corolla in funnel-shaped wide at the throat (2.5-4 cm). Round fruits (2-3 cm in diam), hard and woody when mature.

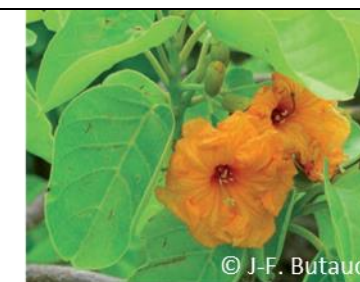

***Ficus prolixa* G.Forst.**

Family: Moraceae

Vernacular name: Ora

Biogeographic status: Indigenous

Parts used: Aerial roots

Botanical description: Large banyan tree (up to 30 m tall), much-branched. Ovate alternate dark green leaves (16 x 6.5 cm). Filiform aerial roots forming thick roots when reach the ground. Subsessile inflorescence and monoecious flowers. Little round fig white to purple when mature.

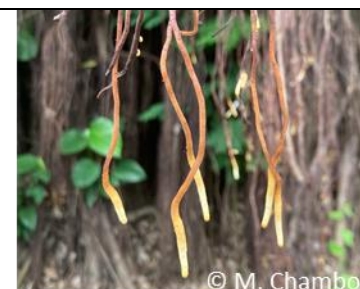

**Table S2.** MZmine parameters

| Module                                                                               | Parameters                                                                                                                                                                                                                                                                                                                                                                                                    |
|--------------------------------------------------------------------------------------|---------------------------------------------------------------------------------------------------------------------------------------------------------------------------------------------------------------------------------------------------------------------------------------------------------------------------------------------------------------------------------------------------------------|
| Raw data methods<br>> Raw data import                                                | Importation of all .mzXML files                                                                                                                                                                                                                                                                                                                                                                               |
| Raw data methods<br>> Mass detection                                                 | Scans MS level : <b>1</b><br>Mass detector : <b>centroid</b><br>Noise level : <b>2.0E3</b>                                                                                                                                                                                                                                                                                                                    |
| Raw data methods<br>> Mass detection                                                 | Scans MS level : <b>2</b><br>Mass detector : <b>centroid</b><br>Noise level : <b>1.5E2</b>                                                                                                                                                                                                                                                                                                                    |
| Feature detection<br>> LC-MS<br>> ADAP chromatogram builder                          | Scans MS level : <b>1</b><br>Min group group size in # of scans : <b>3</b><br>Group intensity threshold : <b>2.0E3</b><br>Min highest intensity : <b>2.0E2</b><br>Scan to scan accuracy (m/z) : <b>10 ppm</b>                                                                                                                                                                                                 |
| Feature detection > Smoothing                                                        | Smoothing algorithm: <b>Loess smoothing</b>                                                                                                                                                                                                                                                                                                                                                                   |
| Feature detection<br>> Chromatogram resolving<br>> Local minimum resolver            | Chromatographic threshold : <b>90%</b><br>Minimum search range RT/Mobility: <b>0.10 (POS); 0.01 (NEG)</b><br>Minimum relative height : <b>15% (POS); 1% (NEG)</b><br>Minimum absolute height : <b>1.0E3</b><br>Min ratio of peak top/edge : <b>1.6</b><br>Peak duration range (min/mobility) : <b>0.01-2.3 (POS); 0.01-2.4 (NEG)</b><br>Min # of data points : <b>3</b>                                       |
| Feature list methods<br>> Isotopes<br>> 13C isotope filter                           | m/z tolerance : <b>10 ppm</b><br>Retention time tolerance : <b>0.1 absolute (min)</b><br>Mobility tolerance : <b>unchecked</b><br>Monotonic shape : <b>unchecked</b><br>Maximum charge : <b>2</b><br>Representative isotope : <b>most intense</b><br>Never remove feature with MS2 : <b>checked</b>                                                                                                           |
| Feature list methods<br>> Alignment<br>> Join aligner                                | m/z tolerance : <b>10 ppm</b><br>Weight for m/z : <b>75</b><br>Retention time tolerance : <b>0.2 absolute (min)</b><br>Weight for RT : <b>25</b><br>Mobility tolerance : <b>unchecked</b><br>Mobility weight : <b>1.00</b><br>Require same charge state : <b>checked</b><br>Require same ID : <b>unchecked</b><br>Compare isotope pattern : <b>unchecked</b><br>Compare spectra similarity : <b>unchecked</b> |
| Feature list methods<br>> Processing<br>> Assign MS <sup>2</sup> to features         | Retention time tolerance : <b>0.1 absolute (min)</b><br>MS1 to MS2 precursor tolerance (m/z ) : <b>10 ppm</b><br>Limit by RT edges : <b>unchecked</b><br>Combine MS/MS spectra (TIMS) : <b>unchecked</b><br>Lock to feature mobility range : <b>unchecked</b><br>Minimum merged intensity : <b>unchecked</b>                                                                                                  |
| Feature list methods<br>> Feature list filtering<br>> Feature list rows filter       | Retention time : <b>0.6 - 30.0 min (auto range)</b><br>Features with MS2 scans : <b>checked</b>                                                                                                                                                                                                                                                                                                               |
| Feature list methods<br>> Feature list filtering<br>> Feature list blank subtraction | Minimum # of detection in blanks : <b>1</b><br>Fold change increase : <b>unchecked</b>                                                                                                                                                                                                                                                                                                                        |

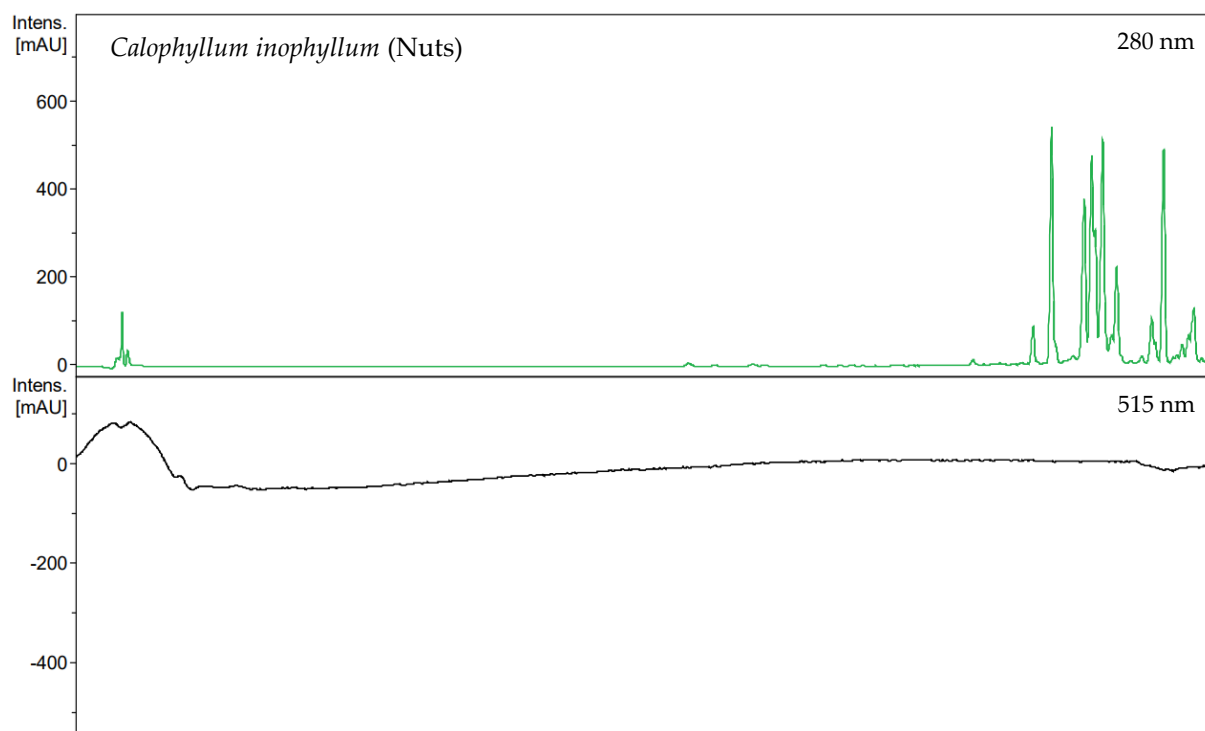

**Figure S1.** On-Line RP HPLC DPPH assay chromatogram profiles of inactive extract.

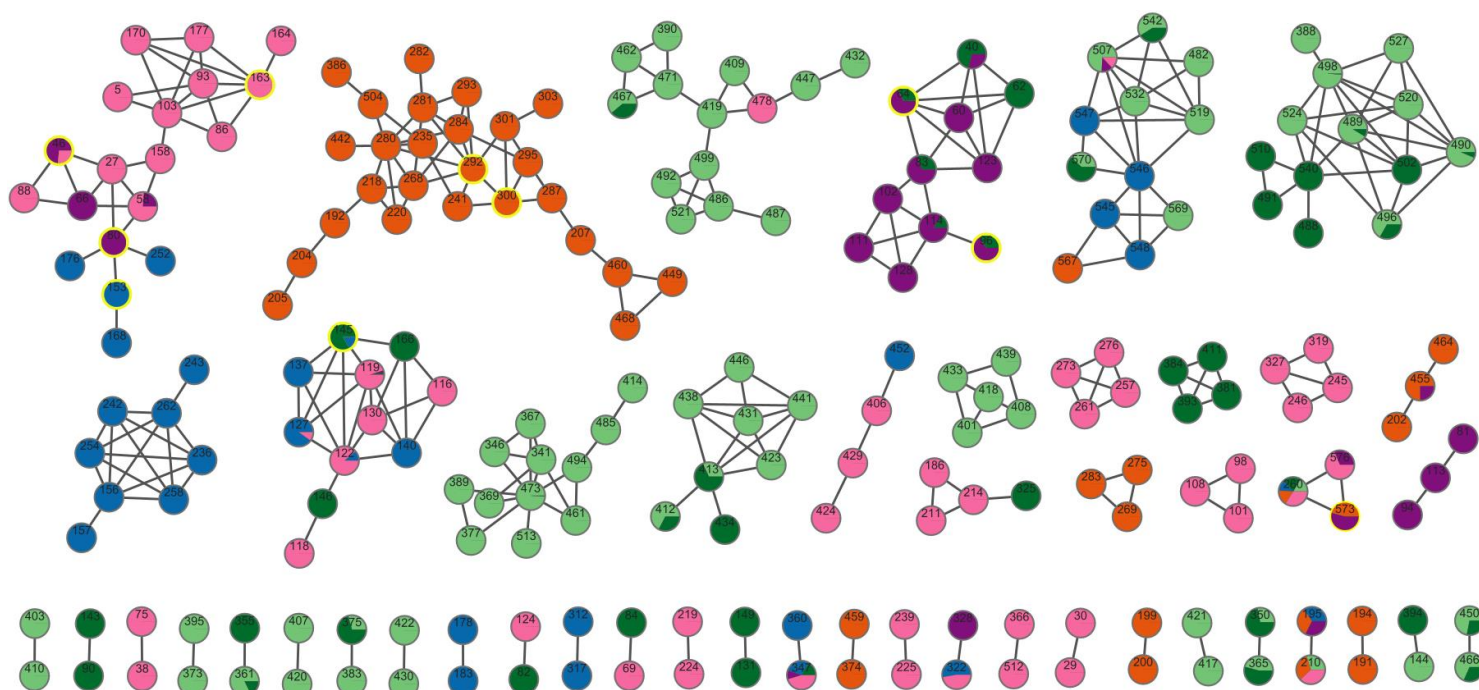

**Figure S2.** Molecular Network cluster created with GNPS using spectral data of crude extracts in negative mode (self-loop nodes removed).

Node colors represent repartition in plant extracts: *C. inophyllum* leaves (dark green), *C. inophyllum* nuts (light green), *F. prolixa* (purple), *C. subcordata* (blue), *G. taitensis* (pink), *C. longa* (orange).
